# Supplementary material
Source: HighWire-hosted journal article supplement (http://qualitysafety.bmj.com/highwire/filestream/160037/field_highwire_adjunct_files/0/bmjqs-2020-012370supp001_data_supplement.pdf)

## Supplementary Appendix I: “Handoff improvement and adverse events-reduction program implementation in paediatric intensive care units in Argentina: a stepped-wedge trial”

Figure 1. Flowchart of the allocated sequence and period.

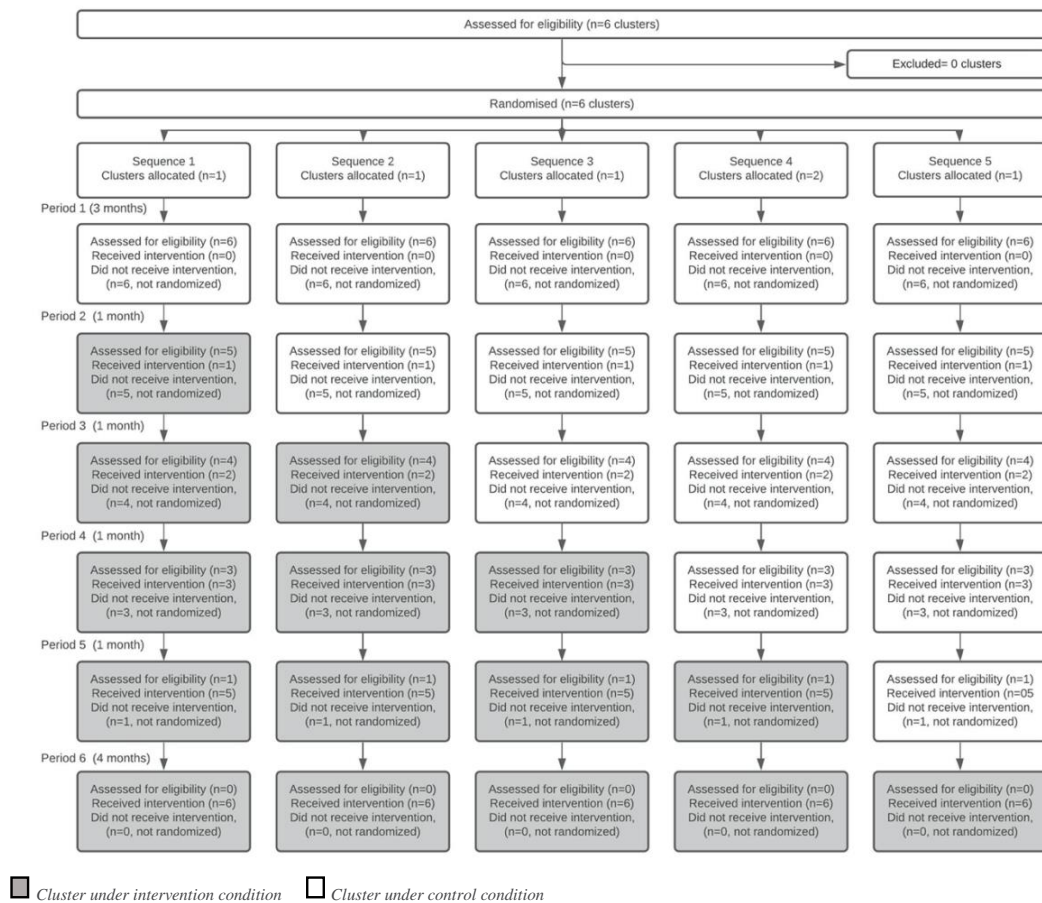

Supplement: bmjqs-2020-012370supp001_data_supplement.pdf [file bmjqs-2020-012370supp001_data_supplement.pdf]
